# Supplementary material for: Crystal phase of nickel sulfide dictates hydrogen evolution activity of various semiconducting photocatalysts
Source: Royal Society of Chemistry journal article supplement (doi:10.1039/d3qi01315d), 2023-01-01
Supplement: d3qi01315d1.pdf [file d3qi01315d1.pdf]

Electronic Supporting Information for

## **Crystal Phase of Nickel Sulfides Dictates Hydrogen Evolution Activity of Various Semiconducting Photocatalysts**

*Jianjian Yi<sup>a</sup>, Yu Xia<sup>a</sup>, Zhou Zhou<sup>a</sup>, Ganghua Zhou<sup>a</sup>, Xianglin Zhu<sup>b</sup>, Sai Zhang<sup>c</sup>, Xingwang Zhu<sup>a</sup>, Xiaozhi Wang<sup>a,\*</sup>, Hui Xu<sup>b,\*</sup>, and Huan Pang<sup>a,\*</sup>*

*<sup>a</sup> College of Environmental Science and Engineering, School of Chemistry and Chemical Engineering, Yangzhou University, Yangzhou, Jiangsu 225127, China*

*<sup>b</sup> Institute for Energy Research, Jiangsu University, Zhenjiang, Jiangsu 212013, China*

*<sup>c</sup> Department of Materials Science and State Key Laboratory of Molecular Engineering of Polymers, Fudan University, Shanghai 200433, China*

\* Corresponding authors:

xzwang@yzu.edu.cn (X. Wang); xh@ujs.edu.cn (H. Xu);

huanpangchem@hotmail.com, panghuan@yzu.edu.cn (H. Pang)

## **Material characterization**

The crystal phase was performed by X-ray diffraction (XRD) on a Bruker D8 Advanced X-ray Diffractometer (Cu-K $\alpha$  radiation:  $\lambda = 0.15406$  nm). The microstructures and morphology of samples were observed by field emission scanning electron microscopy (FE-SEM, S-4800II) under the acceleration voltage of 5.0 kV. High-resolution TEM (HRTEM) images and elemental mapping were captured on a Tecnai G2 F30 S-TWIN at an acceleration voltage of 300 kV. The light absorption capacity was tested by Cary 5000 UV-visible-near-infrared absorption spectrometer. X-ray photoelectron spectra (XPS) was obtained on a Thermo Scientific ESCALAB 250 apparatus. The photoluminescence (PL) spectra were obtained by Edinburgh FLS1000 fluorescence spectrometer.

### **Photo-electrochemical test**

The photocurrents were measured by a CHI 660E electrochemical system, which was equipped with a standard three-electrode system. 2 mg of samples was dispersed in a solution containing 85  $\mu\text{L}$  ethanol and 15  $\mu\text{L}$  EG. Then 30  $\mu\text{L}$  of the suspension was drop-casted onto an indiumtin oxide (ITO)-coated glass and dried on a 1 cm\*1 cm area. In the experiment, an ITO with a sample on it was used as a working electrode. Pt wire was employed as the counter electrode and the reference electrode was Ag/AgCl/sat. KCl. A bias potential of -0.1V (vs. Ag/AgCl) was employed.  $\text{Na}_2\text{SO}_4$  solution (0.1 M) was used as the electrolyte. The light source was a 300 W Xe lamp. The Mott-Schottky plots were also measured using the same three electrode system over an alternating current frequency of 1500 Hz in 0.1M  $\text{Na}_2\text{SO}_4$  aqueous solution.

## Theoretical simulation

The DFT calculations were carried out using the Vienna ab initio simulation package (VASP). The exchange-correlation energy was described using the (PBE). The Perdew-Burke-Ernzerhof (PBE) functional combined with Projected Augmented Wave (PAW) pseudopotentials was used. A 520 eV plane-wave kinetic energy cut off was selected, and a  $3 \times 3 \times 1$  Monkhorst-Pack  $k$  point sampling was adopted for the structure relaxation. A  $p(2 \times 2)$  supercell model with 15 Å vacuum in c-axis was employed to simulate the  $\text{NiS}_x$ . A residual force threshold of  $0.05 \text{ eV \AA}^{-1}$  was set for geometry optimizations. The calculated surface in (001) surface in model building process.

The Gibbs free-energy ( $\Delta G_{\text{H}^*}$ ) is expressed as:  $\Delta G_{\text{H}^*} = \Delta E_{\text{H}^*} + \Delta E_{\text{ZPE}} - T\Delta S$ . Where  $\Delta E_{\text{H}^*}$ ,  $\Delta E_{\text{ZPE}}$  and  $\Delta S$  are the adsorption energy of atomic hydrogen on the given surface, zero point energy correction and entropy change of  $\text{H}^*$  adsorption, respectively. The zero point energy correction can be estimated by the equation  $\Delta E_{\text{ZPE}} = E_{\text{ZPE}}(\text{H}^*) - 1/2 E_{\text{ZPE}}(\text{H}_2)$ .  $\Delta S$  can be calculated by the equation  $\Delta S = S(\text{H}^*) - 1/2 S(\text{H}_2) \approx -1/2 S(\text{H}_2)$ , due to the negligible of the entropy of hydrogen in adsorbed state.  $\Delta E_{\text{H}^*}$  is calculated as  $\Delta E_{\text{H}^*} = E_{\text{tot}} - E_{\text{sub}} - 1/2 E_{\text{H}_2}$ , where  $E_{\text{tot}}$  and  $E_{\text{sub}}$  are energies of H adsorbed system and the clean given surface, and  $E_{\text{H}_2}$  is the energy of  $\text{H}_2$  molecular in gas phase.

## Electrocatalytic hydrogen evolution measurement

The electrocatalytic hydrogen evolution performance of NiS<sub>x</sub> was evaluated on a CHI660E electrochemical workstation. Electrochemical analysis was performed using a standard three-electrode system, which contains a working electrode (a glassy carbon electrode loaded with 0.21 mg/cm<sup>2</sup> catalysts), a reference electrode (a Hg/HgO electrode) and a counter electrode (a Pt wire). 0.5 M H<sub>2</sub>SO<sub>4</sub> was applied as electrolyte. An electrochemical activation process was firstly scanned in cyclic voltammetry from 0 to 0.9 V (vs. Hg/HgO) for 5 circles. Then, the linear sweep voltammetry (LSV) for HER was acquired at the scan rate of 5 mV s<sup>-1</sup>. Finally, all measured potentials are converted to reversible hydrogen electrode (RHE) potentials according to the Nernst equation ( $E_{(RHE)} = E_{(Hg/HgO)} + 0.098V + 0.059 \times pH$ ).

**Table S1.** The phase structure and crystal cell parameters of NiS<sub>x</sub>.

| <b>Sample</b>      | <b>Crystal Phase</b> | <b>Space Group</b>   | <b>a (nm)</b> | <b>c (nm)</b> | <b>V (nm<sup>3</sup>)</b> |
|--------------------|----------------------|----------------------|---------------|---------------|---------------------------|
| h-NiS              | hexagonal            | P6 <sub>3</sub> /mmc | 0.342         | 0.528         | 0.0267                    |
| t-NiS              | trigonal             | R3m                  | 0.963         | 0.315         | 0.126                     |
| c-NiS <sub>2</sub> | cubic                | Pa $\bar{3}$         | 0.567         |               | 0.182                     |

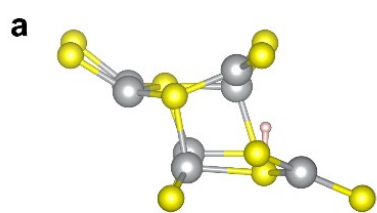

**Hexagonal phase**

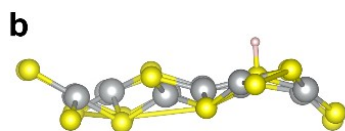

**Trigonal phase**

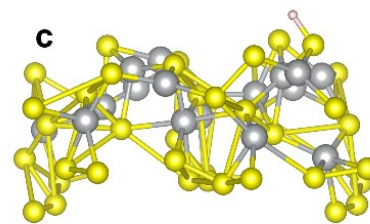

**Cubic phase**

**Figure S1.** Optimized atomic structures of phase-engineered NiS<sub>x</sub> adsorbed with H atom.

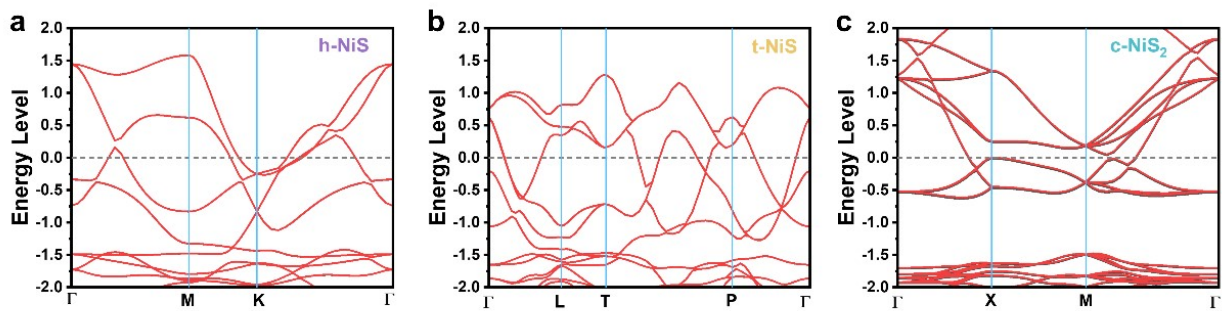

**Figure S2.** Calculated band structures of h-NiS, t-NiS and c-NiS<sub>2</sub>.



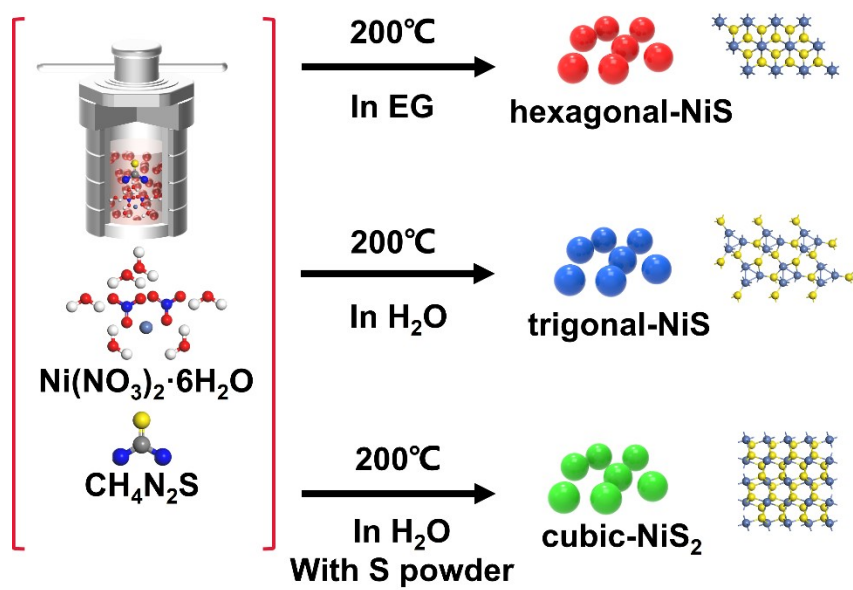

**Figure S3.** Synthetic processes of phase-engineered NiS<sub>x</sub>.

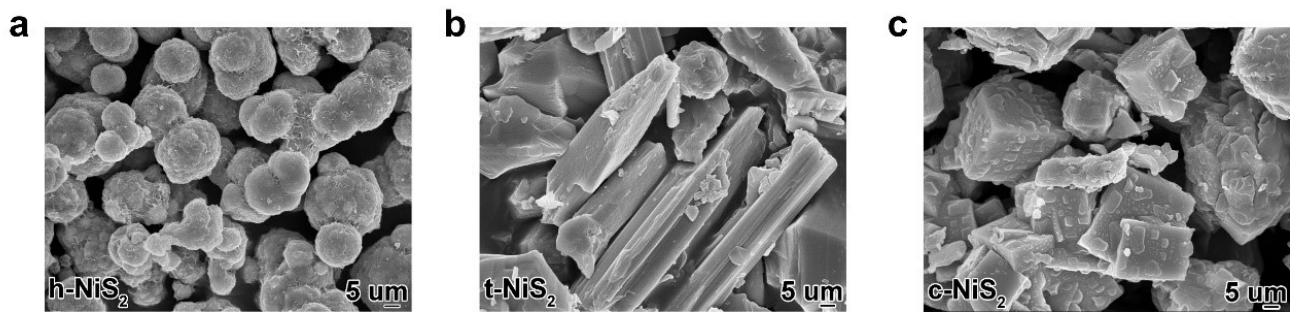

**Figure S4.** SEM images of h-NiS, t-NiS and c-NiS<sub>2</sub>.

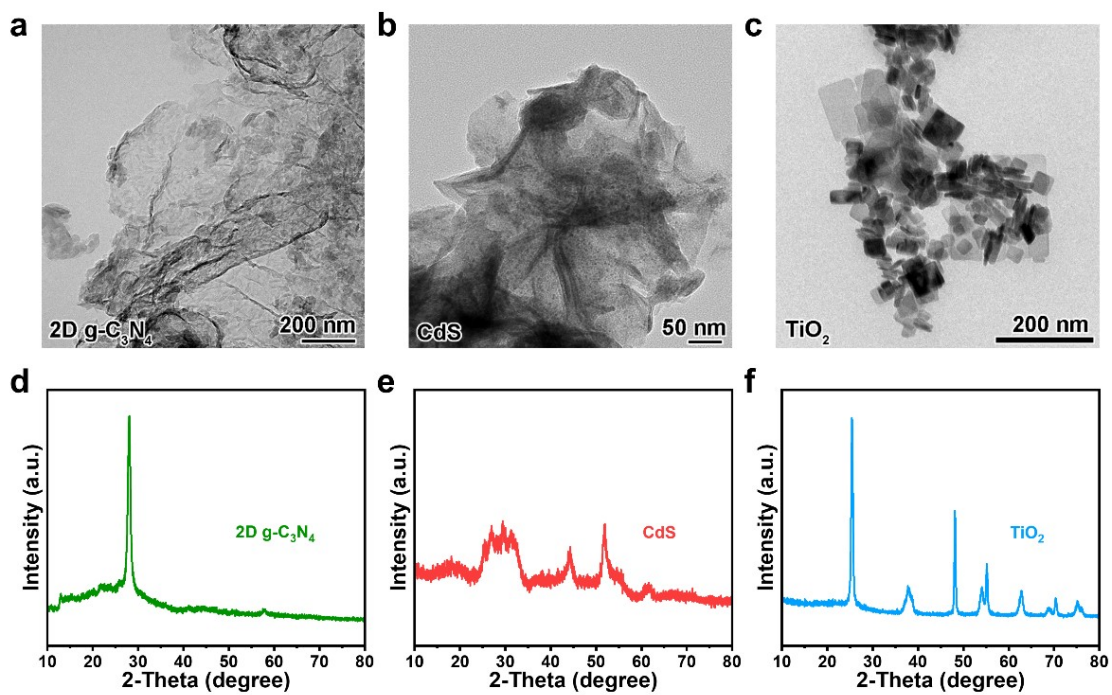

**Figure S5.** (a-c) TEM images of CN nanosheets, CdS nanosheets and TiO<sub>2</sub> nanosheets. (d-f) XRD patterns of CN nanosheets, CdS nanosheets and TiO<sub>2</sub> nanosheets.

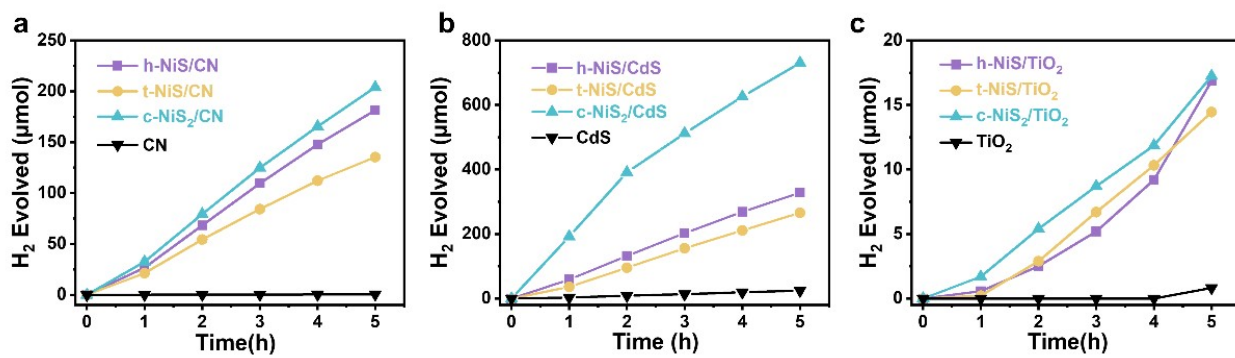

**Figure S6.** Time-dependent hydrogen evolution performance of the catalysts.

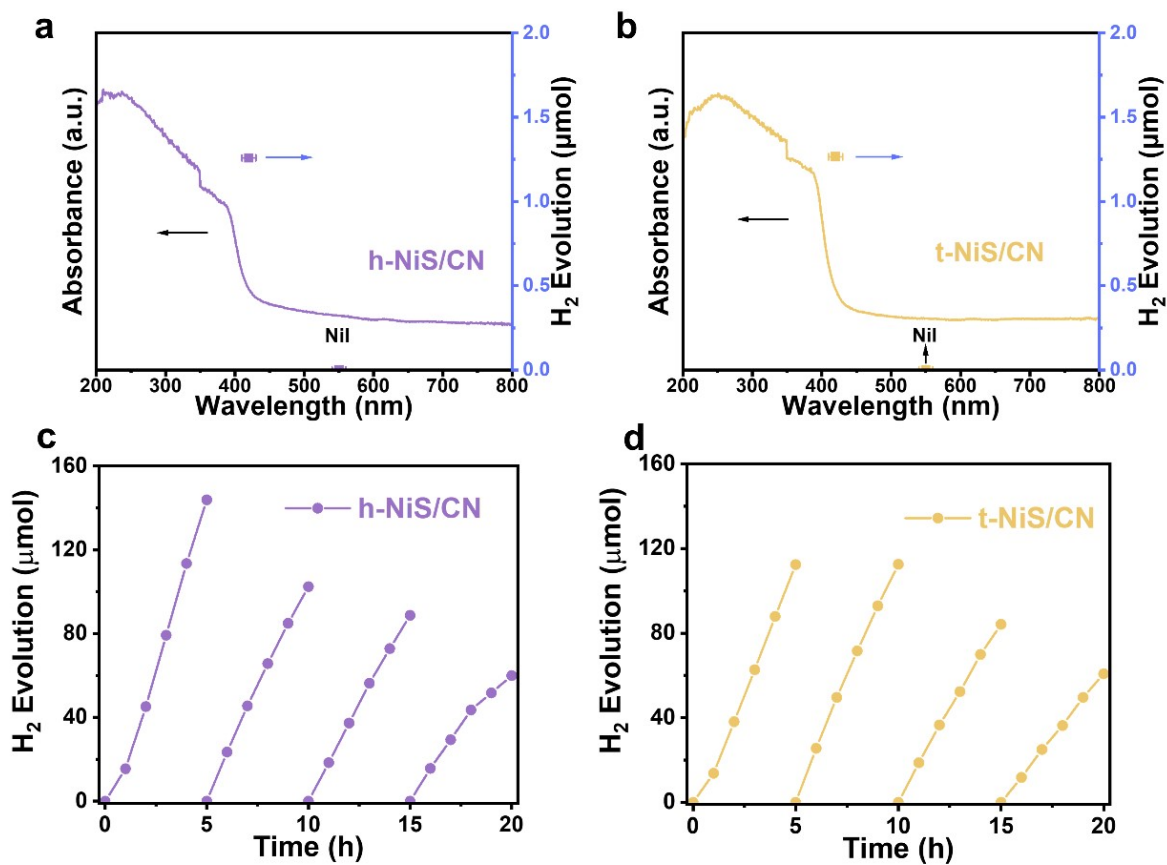

**Figure S7.** (a-b) Wavelength-dependent hydrogen evolution performance of h-NiS/CN and t-NiS/CN. (c-d) Catalytic stability tests of h-NiS/CN and t-NiS/CN.

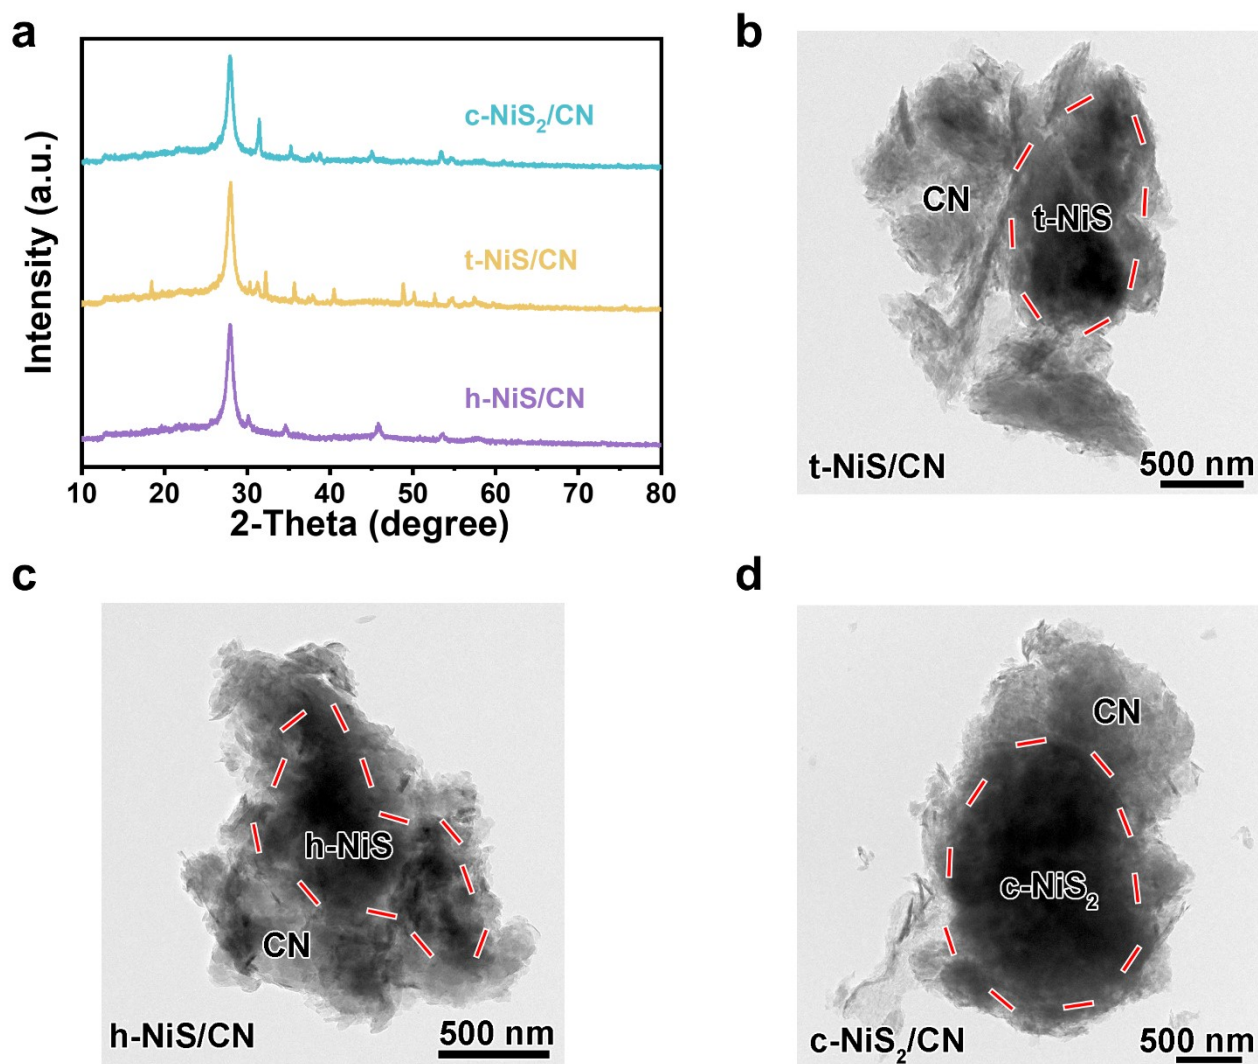

**Figure S8.** (a) XRD patterns and (b-c) TEM images of h-NiS/CN, t-NiS/CN and c-NiS<sub>2</sub>/CN

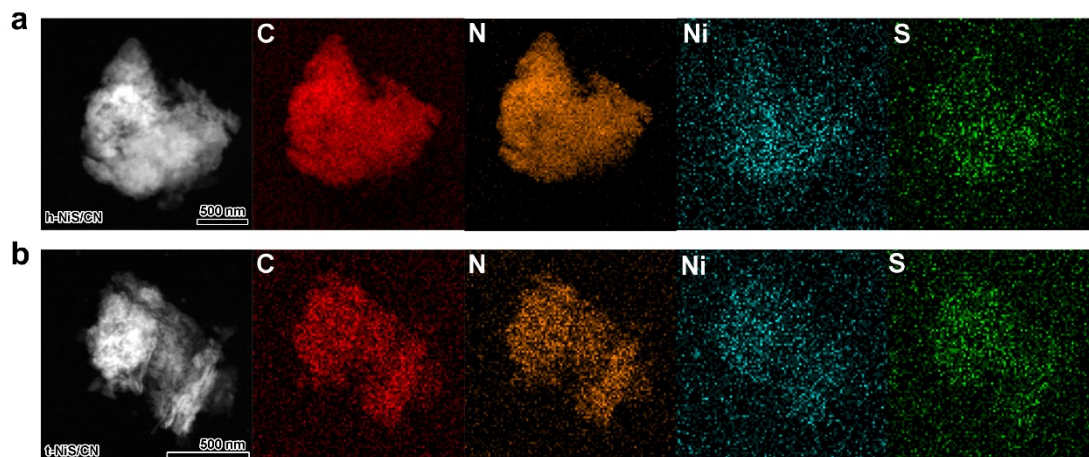

**Figure S9.** STEM images of corresponding elemental mapping of (a) h-NiS/CN and (b) t-NiS/CN

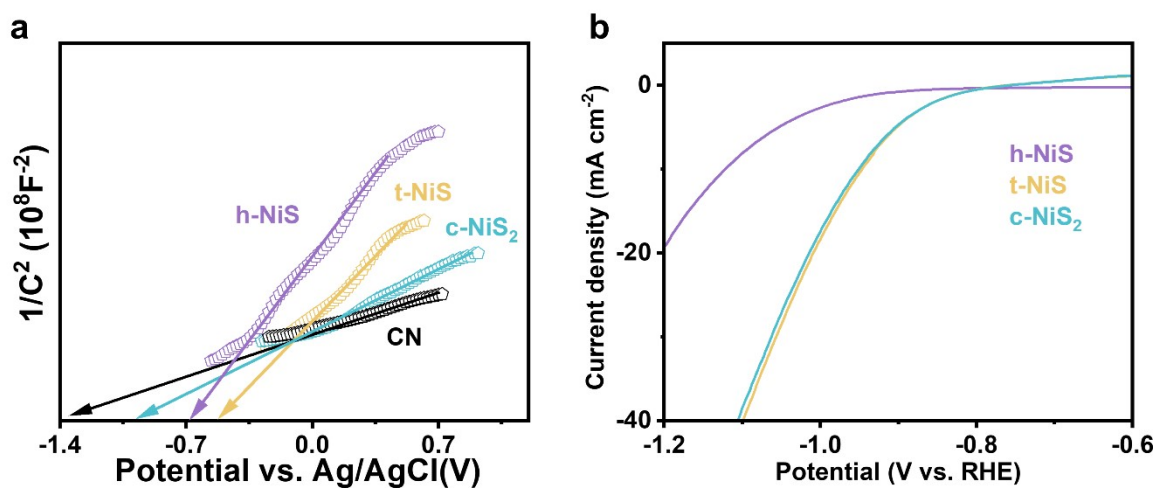

**Figure S10.** (a) Mot-schottky curves of h-NiS, t-NiS, c-NiS<sub>2</sub> and CN in 0.5 M Na<sub>2</sub>SO<sub>4</sub>. (b) LSV curves of h-NiS, t-NiS and c-NiS<sub>2</sub> in 0.5 M H<sub>2</sub>SO<sub>4</sub>.



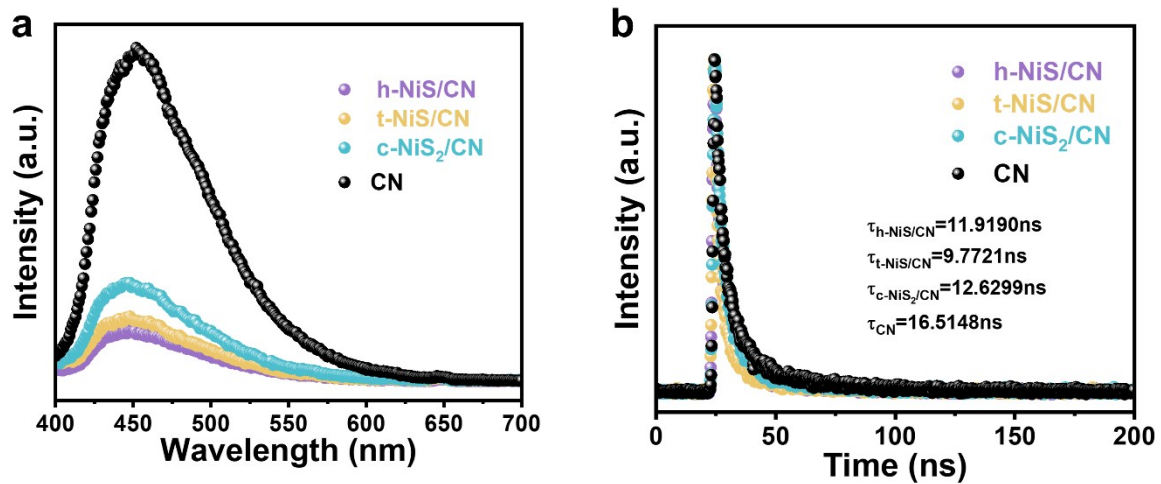

**Figure S11.** (a) Steady-state and (b) transient-state fluorescence spectra of CN, h-NiS/CN, t-NiS/CN and c-NiS<sub>2</sub>/CN.

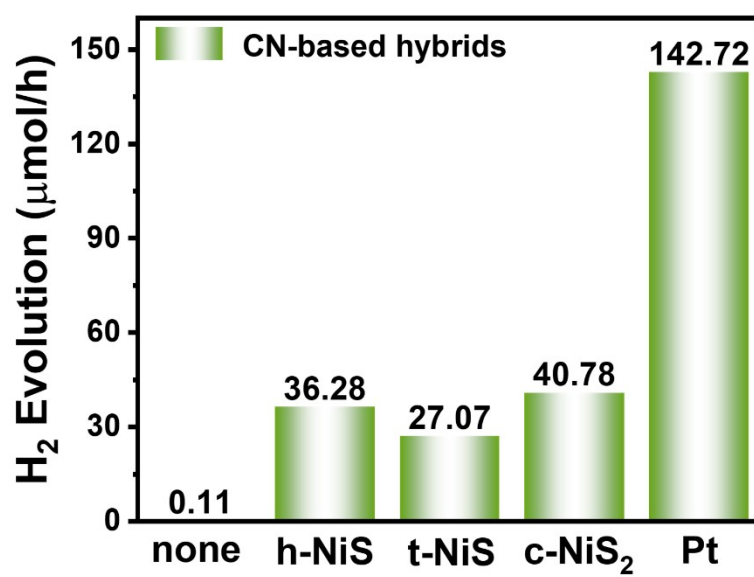

**Figure S12.** performance comparison between Pt and phase-engineered NiS<sub>x</sub> using CN as hosting semiconductor.
